# Supplementary material for: The prevalence, antibiotic resistance and mecA characterization of coagulase negative staphylococci recovered from non-healthcare settings in London, UK
Source: Springer Nature journal article supplement (doi:10.1186/s13756-018-0367-4), 2018-06-13
Supplement: MOESM1 [file 15843218]

**Table S1.** Isolates collected from different environmental sites and human hands.

| Sites               | DSH                                                                                                                                                                                                                                                                         | BCF                                                                                    | DST                                             | DSS                        | DSR                           | DSL   | HB       | HH    |
|---------------------|-----------------------------------------------------------------------------------------------------------------------------------------------------------------------------------------------------------------------------------------------------------------------------|----------------------------------------------------------------------------------------|-------------------------------------------------|----------------------------|-------------------------------|-------|----------|-------|
| Specific sites      | Toilet rims, Keyboards<br>TV remote control,<br>Toilet floor, Duvets,<br>Lift buttons, Tables,<br>Room carpet floor,<br>Water taps, Pillows,<br>Wardrobe handles,<br>Paper dispensers,<br>Bedside lights,<br>Toilet handles,<br>Basin surface,<br>Hand dryers<br>Mattresses | Mother's change bags<br>Nappy changing area<br>Child car seats<br>Dummies<br>Soft play | Pelican crossing buttons<br>Hand rails<br>Seats | Trolley handles<br>Shelves | Knife handles<br>Fork handles | Books | Handbags | Hands |
| No of staphylococci | 74                                                                                                                                                                                                                                                                          | 46                                                                                     | 94                                              | 89                         | 96                            | 35    | 17       | 192   |

Note: DSH- different sites of hotels; BCF- baby care facility; DST- different sites of transportation facilities; DSS- different sites of supermarkets; DSR- different sites of restaurants; DSL- different sites of a library; HB- handbags; HH- human hands.
